# Supplementary material for: Cost-Effectiveness Analysis of Routine Use of 15-Valent Pneumococcal Conjugate Vaccine in the US Pediatric Population
Source: MDPI journal article supplement (doi:10.3390/vaccines11010135), 2023-01-06
Supplement: s1 [file s1]

**Supplementary Table S1. Description of the assumptions and inputs in the scenario analysis**

| Scenario Analysis | Base-case assumptions/inputs description                                                                                                                                                | Scenario analysis assumptions/inputs description                                                                                                                          |
|-------------------|-----------------------------------------------------------------------------------------------------------------------------------------------------------------------------------------|---------------------------------------------------------------------------------------------------------------------------------------------------------------------------|
| 1                 | Target population: entire US population;<br>Vaccine waning: full vaccine protection for first 5 years after vaccination and decreased to 0 for the next 10 years                        | Target population: a single birth cohort<br>Vaccine waning: full vaccine protection for first 10 years after vaccination and no VE thereafter                             |
| 2                 | Perspective: societal perspective (including vaccine acquisition and administration costs, direct medical costs, direct non-medical costs, indirect costs and costs of premature death) | Perspective: health care sector perspective (only including vaccine acquisition and administration costs and direct medical costs)                                        |
| 3                 | Time horizon: 100 years (lifetime)                                                                                                                                                      | Time horizon: 10 years                                                                                                                                                    |
| 4                 | VEs against IPD, simple and recurrent AOM: Table 2                                                                                                                                      | VE against IPD, simple and recurrent AOM: Supplementary Table 3 (Ryman et al. 2022, generated from the post-primary series immunogenicity (IgG GMC) of V114) <sup>a</sup> |
| 5                 | Inputs of QALY decrements related to each PD episode: Table 3 (Rubin et al., 2010 and Mangen et al., 2015) <sup>b,c</sup>                                                               | Inputs of QALY decrements related to each PD episode: Supplementary Table 4 (Tang et al., 2022) <sup>e</sup>                                                              |
| 6                 | Herd immunity on IPD was applied                                                                                                                                                        | No herd immunity was assumed                                                                                                                                              |
| 7                 | Target population: entire US population;<br>Herd immunity was applied                                                                                                                   | Target population: a single birth cohort;<br>No herd immunity was assumed                                                                                                 |
| 8                 | Target population: entire US population;<br>Inputs of QALY decrements related to each PD episode: Table 3 (Rubin et al., 2010 and Mangen et al., 2015) <sup>b,c</sup>                   | Target population: a single birth cohort;<br>Inputs of QALY decrements related to each PD episode: Supplementary Table 4 (Tang et al., 2022) <sup>e</sup>                 |

Abbreviations: VE = vaccine effectiveness; IPD = invasive pneumococcal disease; AOM = acute otitis media; IgG=Immunoglobulin G; GMC= Geometric mean concentration (mcg/mL); V114 = 15-valent pneumococcal conjugate vaccine; QALY=quality-adjusted life years; PD = pneumococcal disease.

Notes:

- a. Source: Ryman J, Weaver J, Yee KL, Sachs JR. Predicting effectiveness of the V114 vaccine against invasive pneumococcal disease in children. *Expert Rev Vaccines*. Oct 2022;21(10):1515-1521. doi:10.1080/14760584.2022.2112179
- b. Source: Rubin JL, McGarry LJ, Strutton DR, et al. Public health and economic impact of the 13-valent pneumococcal conjugate vaccine (PCV13) in the United States. *Vaccine*. Nov 10 2010;28(48):7634-43. doi:10.1016/j.vaccine.2010.09.049
- c. Source: Mangen MJ, Rozenbaum MH, Huijts SM, et al. Cost-effectiveness of adult pneumococcal conjugate vaccination in the Netherlands. *Eur Respir J*. Nov 2015;46(5):1407-16. doi:10.1183/13993003.00325-2015
- d. Source: Tang Z, Matanock A, Jeon S, Leidner AJ. A review of health-related quality of life associated with pneumococcal disease: pooled estimates by age and type of disease. *J Public Health (Oxf)*. Jun 2022;44(2):e234-e240. doi:10.1093/pubmed/fdab159

**Supplementary Table s2. VE of PCV13 and V114 against IPD and AOM in the scenario analysis**

| Disease               | Vaccine type | Serotype-specific effectiveness |     |     |     |     |      |     |     |     |     |     |      |     |     |     |
|-----------------------|--------------|---------------------------------|-----|-----|-----|-----|------|-----|-----|-----|-----|-----|------|-----|-----|-----|
|                       | Serotype     | 1                               | 4   | 5   | 6B  | 7F  | 9V   | 14  | 18C | 19F | 23F | 3   | 6A   | 19A | 22F | 33F |
| IPD                   | PCV13        | 87%                             | 93% | 87% | 94% | 97% | 100% | 94% | 97% | 87% | 98% | 30% | 86%  | 86% | -   | -   |
|                       | V114         | 76%                             | 95% | 84% | 86% | 93% | 99%  | 91% | 94% | 99% | 99% | 54% | 59%  | 78% | 86% | 86% |
| AOM<br>(pneumococcal) | PCV13        | 86%                             | 57% | 86% | 57% | 86% | 57%  | 57% | 57% | 57% | 57% | 15% | 100% | 91% | -   | -   |
|                       | V114         | 86%                             | 57% | 86% | 57% | 86% | 57%  | 57% | 57% | 57% | 57% | 27% | 83%  | 91% | 57% | 57% |

Abbreviations: VE = vaccine effectiveness; IPD = invasive pneumococcal disease; AOM = acute otitis media; PCV13 = 13-valent pneumococcal conjugate vaccine; V114 = 15-valent pneumococcal conjugate vaccine.

**Supplementary Table s3. QALY decrements for IPD, pneumonia and AOM in the scenario analysis**

| Age group<br>(years) | QALY decrements for IPD |                          |                      | QALY decrements for pneumonia |            | QALY decrements for AOMs |               |                         |
|----------------------|-------------------------|--------------------------|----------------------|-------------------------------|------------|--------------------------|---------------|-------------------------|
|                      | Meningitis              | Bacteremia without focus | Bacteremic pneumonia | Inpatient                     | Outpatient | Simple AOM               | Recurrent AOM | AOM with tube placement |
| 0 – 17               | 0.0165                  | 0.0016                   | 0.0016               | 0.0105                        | 0.0004     | 0.0016                   | 0.0016        | 0.0016                  |
| ≥18                  | 0.0547                  | 0.0547                   | 0.0547               | 0.0396                        | 0.0094     | —                        | —             | —                       |

Abbreviations: QALY=quality-adjusted life years; IPD = invasive pneumococcal disease; AOM = acute otitis media.

**Supplementary Table s4. Incremental costs and effectiveness outcomes comparing V114 vs. PCV13 in the scenario analysis**

| Scenarios                                          | Incremental Outcomes<br>(V114 vs. PCV13) |             |            |             |             |             |          |          |
|----------------------------------------------------|------------------------------------------|-------------|------------|-------------|-------------|-------------|----------|----------|
|                                                    | 1                                        | 2           | 3          | 4           | 5           | 6           | 7        | 8        |
| Clinical outcomes<br>(undiscounted)                |                                          |             |            |             |             |             |          |          |
| IPD cases                                          | -1,786                                   | -185,711    | -17,774    | -190,699    | -185,711    | -22,122     | -220     | -1,783   |
| Pneumonia cases                                    | -11,315                                  | -987,727    | -81,655    | -987,621    | -987,727    | -1,001,832  | -11,169  | -11,012  |
| AOM cases                                          | -118,497                                 | -11,151,473 | -1,051,896 | -11,991,523 | -11,151,473 | -11,151,511 | -116,752 | -116,751 |
| PMS cases                                          | -35                                      | -3,592      | -310       | -3,657      | -3,592      | -290        | -3       | -35      |
| IPD deaths                                         | -195                                     | -20,197     | -1,699     | -20,368     | -20,197     | -758        | -9       | -195     |
| Pneumonia deaths                                   | -1                                       | -41         | -35        | -40         | -41         | -513        | -6       | -1       |
|                                                    |                                          |             |            |             |             |             |          |          |
| LYs and QALYs<br>(discounted)                      |                                          |             |            |             |             |             |          |          |
| Total LYs                                          | 874                                      | 90,026      | 6,047      | 91,450      | 90,026      | 10,871      | 410      | 867      |
| Total QALYs                                        | 1,329                                    | 96,056      | 10,696     | 98,501      | 85,926      | 28,050      | 916      | 958      |
|                                                    |                                          |             |            |             |             |             |          |          |
| Cost outcomes<br>(million 2021 USD,<br>discounted) |                                          |             |            |             |             |             |          |          |

|                                   |          |            |            |             |             |            |          |          |
|-----------------------------------|----------|------------|------------|-------------|-------------|------------|----------|----------|
| Vaccine acquisition costs         | \$761    | \$23,166   | \$6,753    | \$25,435    | \$23,166    | \$21,785   | \$749    | \$761    |
| Vaccine administration costs      | \$67     | \$2,034    | \$593      | \$2,233     | \$2,034     | \$1,913    | \$66     | \$67     |
| IPD treatment costs               | -\$25.4  | -\$2,638.2 | -\$669.6   | -\$2,724.2  | -\$2,638.2  | -\$389.2   | -\$11.1  | -\$25.2  |
| Pneumonia treatment costs         | -\$70.2  | -\$2,249.3 | -\$558.3   | -\$2,249.2  | -\$2,249.3  | -\$2,272.4 | -\$69.1  | -\$69.0  |
| AOM treatment costs               | -\$53.0  | -\$1,756.7 | -\$455.4   | -\$1,856.2  | -\$1,756.7  | -\$1,756.7 | -\$52.4  | -\$52.4  |
| PMS treatment costs               | -\$1.7   | -\$155.8   | -\$10.0    | -\$160.3    | -\$155.8    | -\$20.5    | -\$0.8   | -\$1.7   |
| Direct non-medical/indirect costs | -\$40.6  | \$0.0      | -\$322.2   | -\$2,087.7  | -\$2,009.3  | -\$1,018.9 | -\$32.1  | -\$40.1  |
| Costs of premature death          | -\$22.3  | \$0.0      | -\$130.3   | -\$2,040.8  | -\$2,008.2  | -\$242.0   | -\$9.6   | -\$22.2  |
| <b>Total Costs</b>                | -\$213.3 | -\$6,800.0 | -\$2,145.6 | -\$11,118.4 | -\$10,817.6 | -\$5,699.6 | -\$175.0 | -\$210.6 |

|             |               |               |               |               |               |               |               |               |
|-------------|---------------|---------------|---------------|---------------|---------------|---------------|---------------|---------------|
| <b>ICER</b> | V114 dominant |
|-------------|---------------|---------------|---------------|---------------|---------------|---------------|---------------|---------------|

Abbreviations: PCV13 = 13-valent pneumococcal conjugate vaccine; V114 = 15-valent pneumococcal conjugate vaccine; IPD = invasive pneumococcal disease; AOM = acute otitis media; PMS = post meningitis sequelae; LY = life year; QALY = quality-adjusted life year; ICER = incremental cost-effectiveness ratio.
